# Supplementary material for: Crop Wild Relatives as Germplasm Resource for Cultivar Improvement in Mint (Mentha L.)
Source: PubMed Central journal article supplement (PMC7466659; doi:10.3389/fpls.2020.01217), 2020-08-19
Supplement: DataSheet_1.pdf [file DataSheet_1.pdf]

| Data source | Institute code | Number of accessions | INSTCODE | ACRONYM   | FULL_NAME                                                                                                                         | TYPE         | GENEBANK LONG TERM COLLECTIONS | BOTANICAL GARDEN | GENEBANK MEDIUM TERM COLLECTIONS | GENEBANK SHORT TERM COLLECTIONS | STREET_POB                                           | CITY STATE                   | ZIP_CODE   | PHONE                                           | FAX                   | EMAIL                                          | URL                                                                                      | LATITUDE  | LONGITUDE | ALTITUDE | UPDATED ON | VINSTCODE |
|-------------|----------------|----------------------|----------|-----------|-----------------------------------------------------------------------------------------------------------------------------------|--------------|--------------------------------|------------------|----------------------------------|---------------------------------|------------------------------------------------------|------------------------------|------------|-------------------------------------------------|-----------------------|------------------------------------------------|------------------------------------------------------------------------------------------|-----------|-----------|----------|------------|-----------|
| Genesys     | ALB026         | 4                    | ALB026   | PGRC      | Plant Genetic Resources Center                                                                                                    | Governmental | 1                              |                  |                                  |                                 | Rruga Siri Kodra 137/1                               | Tirana                       |            |                                                 |                       | agp08document@gmail.com                        | http://www.genbank.at/                                                                   | 41.36183  | 19.76613  | null     | 9/1/2018   | ALB026    |
| FAO WIEWS   | ALB026         | 4                    | ALB026   | PGRC      | Plant Genetic Resources Center                                                                                                    | Governmental | 1                              |                  |                                  |                                 | Rruga Siri Kodra 137/1                               | Tirana                       |            |                                                 |                       | agp08document@gmail.com                        | http://www.genbank.at/                                                                   | 41.36183  | 19.76613  | null     | 9/1/2018   | ALB026    |
| Genesys     | AUT001         | 13                   | AUT001   | BVAL      | AGES Linz - Austrian Agency for Health and Food Safety / Seed Collection                                                          | Governmental | 1                              |                  |                                  |                                 | Wieningerstrasse 8                                   | Linz                         | A-4020     | +43 (0) 50555 - 41231                           | +43 (0) 50555 - 41119 | genetische.ressourcen@ages.at                  | http://www.genbank.at/                                                                   | 48.26     | 14.28     | null     | 12/12/2014 | AUT001    |
| FAO WIEWS   | AUT001         | 13                   | AUT001   | BVAL      | AGES Linz - Austrian Agency for Health and Food Safety / Seed Collection                                                          | Governmental | 1                              |                  |                                  |                                 | Wieningerstrasse 8                                   | Linz                         | A-4020     | +43 (0) 50555 - 41231                           | +43 (0) 50555 - 41119 | genetische.ressourcen@ages.at                  | http://www.genbank.at/                                                                   | 48.26     | 14.28     | null     | 12/12/2014 | AUT001    |
| Genesys     | AUT025         | 19                   | AUT025   | WIES      | Office of the Styrian Regional Government, Department for Plant Health and Special Crops                                          | Governmental | 1                              |                  |                                  |                                 | Gaisseregg 5                                         | Wies                         | A-8551     | +43 3465 2423-13                                | +43 3465 2423-30      | spezialkulturen-wies@stmk.gv.at                | http://www.spezialkulturen.at/oeffizuell                                                 | 46.73     | 15.3      | null     | 12/12/2014 | AUT025    |
| FAO WIEWS   | AUT025         | 19                   | AUT025   | WIES      | Office of the Styrian Regional Government, Department for Plant Health and Special Crops                                          | Governmental | 1                              |                  |                                  |                                 | Gaisseregg 5                                         | Wies                         | A-8551     | +43 3465 2423-13                                | +43 3465 2423-30      | spezialkulturen-wies@stmk.gv.at                | http://www.spezialkulturen.at/oeffizuell                                                 | 46.73     | 15.3      | null     | 12/12/2014 | AUT025    |
| Genesys     | AZE004         | 1                    | AZE004   | IB        | Institute of Botany                                                                                                               | Governmental | 1                              |                  |                                  |                                 | Badamdar Shosse, 40                                  | Baku                         | AZ1073     | (994 12) 439 32 30                              | (994 12) 439 33 80    | botanica@baku.ab.az                            | http://www.science.az/botany/index.htm                                                   | 40.35637  | 49.81314  | null     |            | AZE004    |
| FAO WIEWS   | AZE004         | 1                    | AZE004   | IB        | Institute of Botany                                                                                                               | Governmental | 1                              |                  |                                  |                                 | Badamdar Shosse, 40                                  | Baku                         | AZ1073     | (994 12) 439 32 30                              | (994 12) 439 33 80    | botanica@baku.ab.az                            | http://www.science.az/botany/index.htm                                                   | 40.35637  | 49.81314  | null     |            | AZE004    |
| Genesys     | AZE014         | 2                    | AZE014   | ASAU      | Azerbaijan State Agrarian University                                                                                              | Governmental | 1                              |                  |                                  |                                 | 1262, Ataturk ave.                                   | Ganja                        | AZ 2000    | (+994 22) 56 57 33                              | (+994 22) 56 24 08    | info@adau.edu.az                               | www.adau.edu.az                                                                          | 40.678523 | 46.346002 | null     | 4/5/2018   | AZE014    |
| FAO WIEWS   | AZE014         | 2                    | AZE014   | ASAU      | Azerbaijan State Agrarian University                                                                                              | Governmental | 1                              |                  |                                  |                                 | 1262, Ataturk ave.                                   | Ganja                        | AZ 2000    | (+994 22) 56 57 33                              | (+994 22) 56 24 08    | info@adau.edu.az                               | www.adau.edu.az                                                                          | 40.678523 | 46.346002 | null     | 4/5/2018   | AZE014    |
| Genesys     | AZE015         | 7                    | AZE015   | GR1       | Genetic Resources Institute                                                                                                       | Governmental | 1                              | 1                |                                  |                                 | 1155 Azadlig ave.                                    | Baku                         | AZ1106     | (99412)499120                                   | (99412)499220         | akparov@yahoo.com                              |                                                                                          | 40.41216  | 49.83528  | null     |            | AZE015    |
| FAO WIEWS   | AZE015         | 7                    | AZE015   | GR1       | Genetic Resources Institute                                                                                                       | Governmental | 1                              | 1                |                                  |                                 | 1155 Azadlig ave.                                    | Baku                         | AZ1106     | (99412)499120                                   | (99412)499220         | akparov@yahoo.com                              |                                                                                          | 40.41216  | 49.83528  | null     |            | AZE015    |
| Genesys     | BEL002         | 6                    | BEL002   | GxABT     | Gembloux agro-biotech, Université de Liège, département des Sciences agronomiques, Phytotechnie tropicale et Horticulture         | Governmental | 1                              |                  |                                  |                                 | Passage des Déportés 2                               | Gembloux                     | B - 5030   | +32 81 62 21 12                                 | +32 81 62 01 10       | gembloLux@ulg.ac.be                            | http://www.gembloLux.ulg.ac.be/pc                                                        | 50.56157  | 4.69631   | null     |            | BEL002    |
| FAO WIEWS   | BEL002         | 6                    | BEL002   | GxABT     | Gembloux agro-biotech, Université de Liège, département des Sciences agronomiques, Phytotechnie tropicale et Horticulture         | Governmental | 1                              |                  |                                  |                                 | Passage des Déportés 2                               | Gembloux                     | B - 5030   | +32 81 62 21 12                                 | +32 81 62 01 10       | gembloLux@ulg.ac.be                            | http://www.gembloLux.ulg.ac.be/pc                                                        | 50.56157  | 4.69631   | null     |            | BEL002    |
| Genesys     | BGD003         | 3                    | BGD003   | BARI      | Bangladesh Agricultural Research Institute                                                                                        | Governmental | 1                              | 0                | 1                                |                                 | 1 Joydebpur, Gazipur                                 | Gazipur                      | 1701       | 880-2-9261501-5                                 |                       | dg.bari@bari.gov.bd                            | www.bari.gov.bd                                                                          | 24.368751 | 88.661814 | null     | 2/5/2018   | BGD003    |
| FAO WIEWS   | BGD003         | 3                    | BGD003   | BARI      | Bangladesh Agricultural Research Institute                                                                                        | Governmental | 1                              | 0                | 1                                |                                 | 1 Joydebpur, Gazipur                                 | Gazipur                      | 1701       | 880-2-9261501-5                                 |                       | dg.bari@bari.gov.bd                            | www.bari.gov.bd                                                                          | 24.368751 | 88.661814 | null     | 2/5/2018   | BGD003    |
| Genesys     | BGR001         | 16                   | BGR001   | IPGR      | Institute for Plant Genetic Resources 'K.Malkov'                                                                                  | Governmental | 1                              | 1                | 1                                |                                 | 1 Druzba 2                                           | Sadovo, Plovdiv district     | 4122       | +359 32 629026                                  | +359 32 629 026       | s.stoyanova@bg.bg                              | http://www.genbank.hit.bg/                                                               | 42.12     | 24.9      | null     | 3/4/2019   | BGR001    |
| FAO WIEWS   | BGR001         | 16                   | BGR001   | IPGR      | Institute for Plant Genetic Resources 'K.Malkov'                                                                                  | Governmental | 1                              | 1                | 1                                |                                 | 1 Druzba 2                                           | Sadovo, Plovdiv district     | 4122       | +359 32 629026                                  | +359 32 629 026       | s.stoyanova@bg.bg                              | http://www.genbank.hit.bg/                                                               | 42.12     | 24.9      | null     | 3/4/2019   | BGR001    |
| Genesys     | BRA003         | 1                    | BRA003   | CENARGEN  | Embrapa Recursos Genéticos e Biotecnologia                                                                                        | Governmental | 1                              | 0                | 1                                |                                 | Parque Estação Biológica, PqEB, Av. W5 Norte (final) | Brasília-DF                  | 70.770-917 | +55 61 3340-4700                                | +55 61 3340-3624      | cenargen.chgeral@embrapa.br                    | http://www.embrapa.br/recursos-geneticos-e-biotecnologia                                 | -15.45    | -47.57    | null     | 5/2/2016   | BRA003    |
| FAO WIEWS   | BRA003         | 1                    | BRA003   | CENARGEN  | Embrapa Recursos Genéticos e Biotecnologia                                                                                        | Governmental | 1                              | 0                | 1                                |                                 | Parque Estação Biológica, PqEB, Av. W5 Norte (final) | Brasília-DF                  | 70.770-917 | +55 61 3340-4700                                | +55 61 3340-3624      | cenargen.chgeral@embrapa.br                    | http://www.embrapa.br/recursos-geneticos-e-biotecnologia                                 | -15.45    | -47.57    | null     | 5/2/2016   | BRA003    |
| Genesys     | CHE001         | 2                    | CHE001   | AGROSCOPE | Agroscope Changins                                                                                                                | Governmental | 1                              | 0                | 0                                |                                 | 0 Route de Duillier 50, CP 1012                      | Nyon                         | CH-1260    | (41-58)4604444                                  | (41-22)3621325        | info@agroscope.admin.ch                        | www.agroscope.ch                                                                         | 46.23     | 6.15      | null     | 10/6/2015  | CHE001    |
| FAO WIEWS   | CHE001         | 2                    | CHE001   | AGROSCOPE | Agroscope Changins                                                                                                                | Governmental | 1                              | 0                | 0                                |                                 | 0 Route de Duillier 50, CP 1012                      | Nyon                         | CH-1260    | (41-58)4604444                                  | (41-22)3621325        | info@agroscope.admin.ch                        | www.agroscope.ch                                                                         | 46.23     | 6.15      | null     | 10/6/2015  | CHE001    |
| Genesys     | CUB014         | 2                    | CUB014   | INIFAT    | Instituto de Investigaciones Fundamentales en Agricultura Tropical                                                                | Governmental |                                |                  |                                  |                                 | Calle 1 esq. 2, Habana                               | Santiago de las Vegas-Ciudad | 17200      | (53) 7 6830910; 7 6832416; 7 6830093; 7 6830098 | (53) 7 6839014        | adolfo@inifat.co.cu                            | www.inifat.co.cu                                                                         | 23.12     | -82.25    | null     | 12/12/2014 | CUB014    |
| FAO WIEWS   | CUB014         | 2                    | CUB014   | INIFAT    | Instituto de Investigaciones Fundamentales en Agricultura Tropical                                                                | Governmental |                                |                  |                                  |                                 | Calle 1 esq. 2, Habana                               | Santiago de las Vegas-Ciudad | 17200      | (53) 7 6830910; 7 6832416; 7 6830093; 7 6830098 | (53) 7 6839014        | adolfo@inifat.co.cu                            | www.inifat.co.cu                                                                         | 23.12     | -82.25    | null     | 12/12/2014 | CUB014    |
| Genesys     | CZE061         | 25                   | CZE061   | CRI       | Gene bank - Vegetables and special crops                                                                                          | Governmental | 1                              | 1                |                                  |                                 | Slechtlietle, 11                                     | Olomouc - Holicie            | 783 71     | +420-585 208966                                 |                       | VURV@genbanka.cz                               | http://genbank.vurv.cz/genetic/resources/                                                | 49.75     | 17.25     | null     |            | CZE061    |
| FAO WIEWS   | CZE061         | 25                   | CZE061   | CRI       | Gene bank - Vegetables and special crops                                                                                          | Governmental | 1                              | 1                |                                  |                                 | Slechtlietle, 11                                     | Olomouc - Holicie            | 783 71     | +420-585 208966                                 |                       | VURV@genbanka.cz                               | http://genbank.vurv.cz/genetic/resources/                                                | 49.75     | 17.25     | null     |            | CZE061    |
| Genesys     | CZE122         | 4                    | CZE122   | CRI       | Gene bank                                                                                                                         | Governmental | 1                              | 0                | 1                                |                                 | 0 Dmrovska 507/73                                    | Prague 6 - Ruzyně            | 161 06     | +420 233 022 497                                | +420 233 311 591      | croscience@vurv.cz                             | http://www.vurv.cz                                                                       | 50.086535 | 14.302742 | null     | 5/1/2018   | CZE122    |
| FAO WIEWS   | CZE122         | 4                    | CZE122   | CRI       | Gene bank                                                                                                                         | Governmental | 1                              | 0                | 1                                |                                 | 0 Dmrovska 507/73                                    | Prague 6 - Ruzyně            | 161 06     | +420 233 022 497                                | +420 233 311 591      | croscience@vurv.cz                             | http://www.vurv.cz                                                                       | 50.086535 | 14.302742 | null     | 5/1/2018   | CZE122    |
| Genesys     | DEU022         | 9                    | DEU022   | BGBM      | Botanical Garden Berlin-Dahlem                                                                                                    | Governmental | 1                              | 1                |                                  |                                 | Koenig-Liuse-Strasse 6-8                             | Berlin                       | 114191     | 030/83850-100                                   | 030/83006-186         | zbgbm@zedat.fu-berlin.de                       | http://www.zbgbm.fu-berlin.de                                                            | 52.45617  | 13.30634  | null     |            | DEU022    |
| FAO WIEWS   | DEU022         | 9                    | DEU022   | BGBM      | Botanical Garden Berlin-Dahlem                                                                                                    | Governmental | 1                              | 1                |                                  |                                 | Koenig-Liuse-Strasse 6-8                             | Berlin                       | 114191     | 030/83850-100                                   | 030/83006-186         | zbgbm@zedat.fu-berlin.de                       | http://www.zbgbm.fu-berlin.de                                                            | 52.45617  | 13.30634  | null     |            | DEU022    |
| Genesys     | DEU146         | 225                  | DEU146   | IPK       | Genebank, Leibniz Institute of Plant Genetics and Crop Plant Research                                                             | Governmental | 1                              |                  |                                  |                                 | Corrensstrasse 3                                     | Gatersleben                  | 6466       | +49 (0)39482 5220                               | +49 (0)39482 5500     | graner@ipk-gatersleben.de                      | http://www.ipk-gatersleben.de                                                            | 51.82599  | 11.27803  | null     |            | DEU146    |
| FAO WIEWS   | DEU146         | 225                  | DEU146   | IPK       | Genebank, Leibniz Institute of Plant Genetics and Crop Plant Research                                                             | Governmental | 1                              |                  |                                  |                                 | Corrensstrasse 3                                     | Gatersleben                  | 6466       | +49 (0)39482 5220                               | +49 (0)39482 5500     | graner@ipk-gatersleben.de                      | http://www.ipk-gatersleben.de                                                            | 51.82599  | 11.27803  | null     |            | DEU146    |
| Genesys     | DEU502         | 10                   | DEU502   |           | Botanical Garden of the University of Osnabrück                                                                                   | Governmental | 1                              | 1                |                                  |                                 | Albrechtstrasse 29                                   | Osnabrück                    | 49076      | 0541/969-2704                                   | 0541/969-2724         | info@bogos.uos.de/                             | http://www.bogos.uos.de/                                                                 | 52.28053  | 8.02756   | null     |            | DEU502    |
| FAO WIEWS   | DEU502         | 10                   | DEU502   |           | Botanical Garden of the University of Osnabrück                                                                                   | Governmental | 1                              | 1                |                                  |                                 | Albrechtstrasse 29                                   | Osnabrück                    | 49076      | 0541/969-2704                                   | 0541/969-2724         | info@bogos.uos.de/                             | http://www.bogos.uos.de/                                                                 | 52.28053  | 8.02756   | null     |            | DEU502    |
| Genesys     | DEU515         | 17                   | DEU515   |           | Botanischer Versuchs- und Lehrgarten der Universität Regensburg                                                                   | Governmental | 1                              |                  |                                  |                                 | Universitätsstrasse 31                               | Regensburg                   | 93053      | 0941/9433-295                                   | 0941/9433-106         |                                                | http://www.biologie.uni-regensburg.de/ZentraleEinrichtungen/BotanischerGarten/index.html | 48.99326  | 12.09101  | null     |            | DEU515    |
| FAO WIEWS   | DEU515         | 17                   | DEU515   |           | Botanischer Versuchs- und Lehrgarten der Universität Regensburg                                                                   | Governmental | 1                              |                  |                                  |                                 | Universitätsstrasse 31                               | Regensburg                   | 93053      | 0941/9433-295                                   | 0941/9433-106         |                                                | http://www.biologie.uni-regensburg.de/ZentraleEinrichtungen/BotanischerGarten/index.html | 48.99326  | 12.09101  | null     |            | DEU515    |
| Genesys     | DEU626         | 12                   | DEU626   |           | Pädagogische Hochschule Karlsruhe                                                                                                 | Governmental | 1                              |                  |                                  |                                 | Bismarckstraße 10                                    | Karlsruhe                    | 76133      | +49 721 925 3                                   | +49 721 925 4000      | poststelle(at)ph-karlsruhe.de                  | http://www.ph-karlsruhe.de/anschrift/                                                    | 49.01324  | 8.39326   | null     |            | DEU626    |
| FAO WIEWS   | DEU626         | 12                   | DEU626   |           | Pädagogische Hochschule Karlsruhe                                                                                                 | Governmental | 1                              |                  |                                  |                                 | Bismarckstraße 10                                    | Karlsruhe                    | 76133      | +49 721 925 3                                   | +49 721 925 4000      | poststelle(at)ph-karlsruhe.de                  | http://www.ph-karlsruhe.de/anschrift/                                                    | 49.01324  | 8.39326   | null     |            | DEU626    |
| Genesys     | ECU023         | 64                   | ECU023   | DENAREF   | Departamento Nacional de Recursos Fitogenéticos                                                                                   | Governmental | 1                              | 1                | 1                                |                                 | 1340                                                 | Quito, Pichincha             |            | (5932)2693359                                   | (5932)2693359         | denaref@cnecet.ec                              | http://www.denaref.org                                                                   | 0-14      | -78.25    | null     |            | ECU023    |
| FAO WIEWS   | ECU023         | 64                   | ECU023   | DENAREF   | Departamento Nacional de Recursos Fitogenéticos                                                                                   | Governmental | 1                              | 1                | 1                                |                                 | 1340                                                 | Quito, Pichincha             |            | (5932)2693359                                   | (5932)2693359         | denaref@cnecet.ec                              | http://www.denaref.org                                                                   | 0-14      | -78.25    | null     |            | ECU023    |
| Genesys     | ESP003         | 6                    | ESP003   | UPM-BGV   | Comunidad de Madrid. Universidad Politécnica de Madrid. Escuela Técnica Superior de Ingenieros Agrónomos. Banco de Germoplasma    | Governmental | 1                              |                  |                                  |                                 |                                                      | Madrid                       | 28040      | -913365627                                      | -913365622            | bgv.agronomos@upm.es/                          | http://www.bancodegermoplasma.upm.es/                                                    | 40.27     | -3.43     | null     | 12/12/2014 | ESP003    |
| FAO WIEWS   | ESP003         | 6                    | ESP003   | UPM-BGV   | Comunidad de Madrid. Universidad Politécnica de Madrid. Escuela Técnica Superior de Ingenieros Agrónomos. Banco de Germoplasma    | Governmental | 1                              |                  |                                  |                                 |                                                      | Madrid                       | 28040      | -913365627                                      | -913365622            | bgv.agronomos@upm.es/                          | http://www.bancodegermoplasma.upm.es/                                                    | 40.27     | -3.43     | null     | 12/12/2014 | ESP003    |
| Genesys     | ESP010         | 2                    | ESP010   | IAEX      | Junta de Extremadura. Dirección General de Ciencia y Tecnología. Centro de Investigación Agraria Finca La Orden - Valdealsequera. | Governmental | 1                              |                  |                                  |                                 | A-V km 372. Apto. 22                                 | Badajoz                      | 6080       | -924013966                                      | -924013967            | francisco.gonzalezlopez@juntadeextremadura.net | http://centrodeinvestigacionlaorden.es                                                   | 38.84     | -6.67     | null     | 12/12/2014 | ESP010    |
| FAO WIEWS   | ESP010         | 2                    | ESP010   | IAEX      | Junta de Extremadura. Dirección General de Ciencia y Tecnología. Centro de Investigación Agraria Finca La Orden - Valdealsequera. | Governmental | 1                              |                  |                                  |                                 | A-V km 372. Apto. 22                                 | Badajoz                      | 6080       | -924013966                                      | -924013967            | francisco.gonzalezlopez@juntadeextremadura.net | http://centrodeinvestigacionlaorden.es                                                   | 38.84     | -6.67     | null     | 12/12/2014 | ESP010    |
| Genesys     | ESP027         | 4                    | ESP027   | CITA-HOR  | Gobierno de Aragón. Centro de Investigación y Tecnología Agroalimentaria. Banco de Germoplasma de Hortalizas                      | Governmental | 1                              |                  |                                  |                                 | Avda. Montañana 177. Apto. 727                       | Montañana, Zaragoza          | 50080      | -976716328                                      | -976716301            | cnalor@aragon.es                               | http://www.cita-aragon.es                                                                | 41.41     | -0.48     | null     | 12/12/2014 | ESP027    |
| FAO WIEWS   | ESP027         | 4                    | ESP027   | CITA-HOR  | Gobierno de Aragón. Centro de Investigación y Tecnología Agroalimentaria. Banco de Germoplasma de Hortalizas                      | Governmental | 1                              |                  |                                  |                                 | Avda. Montañana 177. Apto. 727                       | Montañana, Zaragoza          | 50080      | -976716328                                      | -976716301            | cnalor@aragon.es                               | http://www.cita-aragon.es                                                                | 41.41     | -0.48     | null     | 12/12/2014 | ESP027    |
| Genesys     | ESP109         | 8                    | ESP109   | ITACYL    | Junta de Castilla y León. Instituto Tecnológico Agrario de Castilla y León. Centro de Investigación de Zamadueñas                 | Governmental | 1                              |                  |                                  |                                 | Ctra. de Burgos km 119. Apto. 172                    | Valladolid                   | 47080      | -983414397                                      | -983414746            | camsalco@itacyl.es                             | http://www.itacyl.es                                                                     | 41.39     | -4.43     | null     | 12/12/2014 | ESP109    |
| FAO WIEWS   | ESP109         | 8                    | ESP109   | ITACYL    | Junta de Castilla y León. Instituto Tecnológico Agrario de Castilla y León. Centro de Investigación de Zamadueñas                 | Governmental | 1                              |                  |                                  |                                 |                                                      |                              |            |                                                 |                       |                                                |                                                                                          |           |           |          |            |           |

|           |        |     |        |          |                                                                                    |                  |   |   |   |   |                                  |                                          |              |                     |                  |                                          |                                                         |           |           |      |            |        |
|-----------|--------|-----|--------|----------|------------------------------------------------------------------------------------|------------------|---|---|---|---|----------------------------------|------------------------------------------|--------------|---------------------|------------------|------------------------------------------|---------------------------------------------------------|-----------|-----------|------|------------|--------|
| FAO WIEWS | SVK001 | 1   | SVK001 | SVKPIEST | Plant Production Research Center Piestany                                          | Governmental     | 1 |   |   |   | Bratislavská cesta 122           | Piestany                                 | 921 68       | -7721923            | -7725918         | benedikova@vurv.sk                       | http://www.crvv.sk/en/introduction/                     | 48.35     | 17.5      | null | 12/12/2014 | SVK001 |
| Genesys   | SWE054 | 3   | SWE054 | NORDGEN  | Nordic Genetic Resource Center                                                     | Regional         | 1 | 0 | 0 | 0 | P.O. Box 41                      | Alnarp                                   | SE-230 53    | +46 (0)40 536640    | +46 (0)40 536650 | nordgen@nordgen.org                      | http://www.nordgen.org                                  | 55.39     | 13.05     | null |            | SWE054 |
| FAO WIEWS | SWE054 | 3   | SWE054 | NORDGEN  | Nordic Genetic Resource Center                                                     | Regional         | 1 | 0 | 0 | 0 | P.O. Box 41                      | Alnarp                                   | SE-230 53    | +46 (0)40 536640    | +46 (0)40 536650 | nordgen@nordgen.org                      | http://www.nordgen.org                                  | 55.39     | 13.05     | null |            | SWE054 |
| FAO WIEWS | SYR002 | 3   | SYR002 | ICARDA   | International Centre for Agricultural Research in Dry Areas                        | CGIAR            | 1 | 0 | 0 | 0 | P.O. Box 5466                    | Aleppo                                   |              | (963-21)213433      | (963-21)213490   | icarda@cgiar.org                         | http://www.icarda.cgiar.org/                            | 36.09     | 37.09     | null |            | SYR002 |
| FAO WIEWS | TUN029 | 78  | TUN029 | BNG      | Banque nationale de gènes de Tunisie                                               | Governmental     | 1 | 0 | 1 | 0 | Arafat, 1080 Charguia 1          | Tunis                                    |              |                     |                  |                                          | www.bng.nat.tn                                          | 36.844274 | 10.20675  | null | 9/1/2018   | TUN029 |
| FAO WIEWS | TUR001 | 1   | TUR001 | AARI     | Plant Genetic Resources Department                                                 | Governmental     | 1 |   |   |   | P.O. Box 9, Menemen              | Izmir                                    | 35661        | (90-232)8461331     | (90-232)8461107  | pgr@aari.gov.tr                          | http://www.aari.gov.tr                                  | 38.34     | 27.03     | null | 12/12/2014 | TUR001 |
| Genesys   | TWN001 | 4   | TWN001 | AVRDC    | World Vegetable Center                                                             | Non-Governmental | 1 | 0 | 0 | 0 | P.O. Box 42                      | Shanhua, Tainan                          | 741          | 886 6 583 7801      | 886 6 583 0009   | info@worldveg.org                        | http://www.avrdc.org/                                   | 23.114203 | 120.2982  | null |            | TWN001 |
| FAO WIEWS | TWN001 | 4   | TWN001 | AVRDC    | World Vegetable Center                                                             | Non-Governmental | 1 | 0 | 0 | 0 | P.O. Box 42                      | Shanhua, Tainan                          | 741          | 886 6 583 7801      | 886 6 583 0009   | info@worldveg.org                        | http://www.avrdc.org/                                   | 23.114203 | 120.2982  | null |            | TWN001 |
| Genesys   | UKR018 | 169 | UKR018 | IEL      | Institute of Volatile Oil Bearing and Medicine Crops                               | Governmental     |   |   |   |   | Vul. Kyivs'ka 150                | Simferopol', Crimea                      | 95034        | (380652)223405/6705 | (380652)223419   | efirm@cris.crimea.ua; efirm@pop.cris.net |                                                         | 44.57     | 34.05     | null | 12/12/2014 | UKR018 |
| FAO WIEWS | UKR018 | 169 | UKR018 | IEL      | Institute of Volatile Oil Bearing and Medicine Crops                               | Governmental     |   |   |   |   | Vul. Kyivs'ka 150                | Simferopol', Crimea                      | 95034        | (380652)223405/6705 | (380652)223419   | efirm@cris.crimea.ua; efirm@pop.cris.net |                                                         | 44.57     | 34.05     | null | 12/12/2014 | UKR018 |
| Genesys   | UKR019 | 256 | UKR019 | ILR      | Research Station of Medicinal Crops                                                | Governmental     |   |   |   |   | S. Berezotocha                   | Lubens'kyi r-n, Poltava's'ka obl.        | 37535        | (38053615)20536     | (38053615)20536  |                                          |                                                         | 50.01     | 33        | null | 12/12/2014 | UKR019 |
| FAO WIEWS | UKR019 | 256 | UKR019 | ILR      | Research Station of Medicinal Crops                                                | Governmental     |   |   |   |   | S. Berezotocha                   | Lubens'kyi r-n, Poltava's'ka obl.        | 37535        | (38053615)20536     | (38053615)20536  |                                          |                                                         | 50.01     | 33        | null | 12/12/2014 | UKR019 |
| Genesys   | UKR036 | 1   | UKR036 | NBS      | Nikitsky Botanical Gardens                                                         | Governmental     | 1 | 1 |   |   | S. Nikita                        | Yalta, Crimea                            | 98648        | (380654)335597/30   | (380654)335386   | nbs1812@ukr.net                          |                                                         | 44.3      | 34.09     | null | 12/12/2014 | UKR036 |
| FAO WIEWS | UKR036 | 1   | UKR036 | NBS      | Nikitsky Botanical Gardens                                                         | Governmental     | 1 | 1 |   |   | S. Nikita                        | Yalta, Crimea                            | 98648        | (380654)335597/30   | (380654)335386   | nbs1812@ukr.net                          |                                                         | 44.3      | 34.09     | null | 12/12/2014 | UKR036 |
| Genesys   | UKR075 | 2   | UKR075 | IFS      | Kolomyia Experimental Station                                                      | Governmental     |   |   |   |   | S. Piadyky                       | Kolomyjs'kyi r-n, Ivano-Frankivs'ka obl. | 78254        | (3803433)23804      | (3803433)23804   |                                          |                                                         | 48.03     | 25.31     | null | 12/12/2014 | UKR075 |
| FAO WIEWS | UKR075 | 2   | UKR075 | IFS      | Kolomyia Experimental Station                                                      | Governmental     |   |   |   |   | S. Piadyky                       | Kolomyjs'kyi r-n, Ivano-Frankivs'ka obl. | 78254        | (3803433)23804      | (3803433)23804   |                                          |                                                         | 48.03     | 25.31     | null | 12/12/2014 | UKR075 |
| Genesys   | USA022 | 2   | USA022 | WG       | Western Regional Plant Introduction Station, USDA-ARS, Washington State University | Governmental     | 1 |   |   |   | 59 Johnson Hall, P.O. Box 646402 | Pullman, WA 99164-6402                   |              | (1-509)3351502      | (1-509)3356654   | w6@ars-grin.gov                          | http://www.ars-grin.gov/ars/PacWest/Pullman/            | 46.46     | -117.09   | null | 12/12/2014 | USA022 |
| FAO WIEWS | USA022 | 2   | USA022 | WG       | Western Regional Plant Introduction Station, USDA-ARS, Washington State University | Governmental     | 1 |   |   |   | 59 Johnson Hall, P.O. Box 646402 | Pullman, WA 99164-6402                   |              | (1-509)3351502      | (1-509)3356654   | w6@ars-grin.gov                          | http://www.ars-grin.gov/ars/PacWest/Pullman/            | 46.46     | -117.09   | null | 12/12/2014 | USA022 |
| Genesys   | USA026 | 539 | USA026 | COR      | National Clonal Germplasm Repository USDA, ARS                                     | Governmental     | 1 |   |   |   | 33447 Peoria Road                | Corvallis, Oregon                        | 97333-2521   | (1-541)750-8712     | (1-541)750-8717  | corkh@ars-grin.gov                       | http://www.ars-grin.gov/ars/PacWest/Corvallis/ncgr.html | 44.35     | -123.16   | null | 12/12/2014 | USA026 |
| FAO WIEWS | USA026 | 539 | USA026 | COR      | National Clonal Germplasm Repository USDA, ARS                                     | Governmental     | 1 |   |   |   | 33447 Peoria Road                | Corvallis, Oregon                        | 97333-2521   | (1-541)750-8712     | (1-541)750-8717  | corkh@ars-grin.gov                       | http://www.ars-grin.gov/ars/PacWest/Corvallis/ncgr.html | 44.35     | -123.16   | null | 12/12/2014 | USA026 |
| Genesys   | USA151 | 1   | USA151 | NAGU     | National Arboretum-Germplasm Unit, USDA/ARS                                        | Governmental     |   |   |   |   | 3501 New York Ave. NE            | Washington, DC 20002                     | (202)4754829 |                     |                  |                                          |                                                         | 38.91234  | -76.96992 | null |            | USA151 |
| FAO WIEWS | USA151 | 1   | USA151 | NAGU     | National Arboretum-Germplasm Unit, USDA/ARS                                        | Governmental     |   |   |   |   | 3501 New York Ave. NE            | Washington, DC 20002                     | (202)4754829 |                     |                  |                                          |                                                         | 38.91234  | -76.96992 | null |            | USA151 |
| FAO WIEWS | ZAF062 | 2   | ZAF062 | DAFF     | Genetic Resources Directorate, Department of Agriculture, Forestry and Fisheries   | Governmental     | 0 | 0 | 0 | 0 | Private Bag X973                 | Pretoria                                 | 1            | +27 12 319 6366     | (27-12)329-7279  | dgr@nda.agric.za                         |                                                         | 25.73     | 28.22     | null | 2/5/2018   | ZAF062 |
